# Supplementary material for: Effect of Serum and Oxygen on the In Vitro Culture of Hanwoo Korean Native Cattle-Derived Skeletal Myogenic Cells Used in Cellular Agriculture
Source: MDPI journal article supplement (doi:10.3390/foods12071384), 2023-03-24
Supplement: s1 [file s1]

**Supplementary Table S1.** Primer list used for real time PCR.

| <b>Genes</b>         |         | <b>Sequence</b>             | <b>Accession No.</b> |
|----------------------|---------|-----------------------------|----------------------|
| <i>PAX7</i>          | Forward | AGGACGGCGAGAAGAAAGC         | XM_019984705.1       |
|                      | Reverse | CCCTTTGTCGCCCAGGAT          |                      |
| <i>MYF5</i>          | Forward | CAGCCTCTCTCTCCCCAGTTG       | NM_174116.1          |
|                      | Reverse | AGGCCCTGGAGTTGCA            |                      |
| <i>MYOD1</i>         | Forward | CACGTCTAGCAACCCAAACCA       | AB110599.1           |
|                      | Reverse | ATGGCGTTGCGCAGGAT           |                      |
| <i>MYOG</i>          | Forward | GACGCCATCATCCATGTTCTAC      | NM_173881.2          |
|                      | Reverse | GGGCATCAGCACCGAAGT          |                      |
| <i>MYF6</i>          | Forward | GGCGGCGGCTCAAGA             | AB110601.1           |
|                      | Reverse | AACGAGGCCTTCGAGG            |                      |
| <i>MYH1</i>          | Forward | GCCAGACTGTAGAGCAGGTATATAACG | NM_174117.1          |
|                      | Reverse | GCAACCATCCACAGGAACATC       |                      |
| <i>MSTN</i>          | Forward | CGGCTCCTTGGAAGACGAT         | NM_001001525.3       |
|                      | Reverse | CTCCGTGGGCATGGTAATG         |                      |
| <i>TERT</i>          | Forward | GCAGGTCCTACATCCAGTGTC       | NM_001046242.1       |
|                      | Reverse | TCCATGTCCCATAGCAGAAG        |                      |
| <i>CDKN1A</i>        | Forward | CTCCCAGGGCCGGA              | NM_001098958.2       |
|                      | Reverse | GCGTTTGGAGTGGTAGAAATCTG     |                      |
| <i>TP53</i>          | Forward | TTACGCGCGGAGTATTTGG         | NM_174201.2          |
|                      | Reverse | GGCACCACCACACTGTGTCTA       |                      |
| <i>MYC</i>           | Forward | CATCCTGTGGTCCAAGCA          | NM_001046074.2       |
|                      | Reverse | CTCTTCTGCAACACGTCTATTTCTG   |                      |
| <i>BAX</i>           | Forward | CGCATCGGAGATGAATTGG         | NM_173894.1          |
|                      | Reverse | CCACAGCTGCGATCATCCT         |                      |
| <i>BCL2</i>          | Forward | GGAGCTGTATGGCCCTAGCAT       | NM_001166486.1       |
|                      | Reverse | CCTTCAGAGACAGCCAGGAGAA      |                      |
| <i>NOX1</i>          | Forward | TGATCCTGCCTCCTACTGCAA       | NM_001191340.1       |
|                      | Reverse | GTGCAAGGATCCATTTCCAAGA      |                      |
| <i>GPX1</i>          | Forward | TTTGGGCATCAGGAAAACG         | NM_174076.3          |
|                      | Reverse | CGGACGTACTTCAGGCAATTC       |                      |
| <i>SOD1</i>          | Forward | GTTGGAGACCTGGGCAATGT        | NM_174615.2          |
|                      | Reverse | ACAATATCCACGATGGCAACAC      |                      |
| <i>SOD2</i>          | Forward | GGGTGATGTTACAGCTCAGATAGCT   | NM_201527.2          |
|                      | Reverse | GGCCCCACCGTTGA              |                      |
| <i>SOD3</i>          | Forward | TGGAGGCCTTCTTCCACCTT        | NM_001082610.1       |
|                      | Reverse | TGGATGGCACGGTTTGTG          |                      |
| <i>HIF</i>           | Forward | GATCTCGTCGAAGTAAAGAGTCTGAA  | NM_174339.3          |
|                      | Reverse | AGCCTTATCAAGATGCGAGCTT      |                      |
| <i>MAPK-14 (p38)</i> | Forward | TTTTGCACGTCTTGCTATTTGAG     | NM_01102174.1        |
|                      | Reverse | AGGTGACACGGTTCTGAACTAC      |                      |
| <i>MAPK-3 (ERK1)</i> | Forward | GCACATTGCGAGAGATTCAGATT     | NM_001110018.1       |
|                      | Reverse | GGTGCCCGCAGAATGTCT          |                      |
| <i>MAPK-1 (ERK2)</i> | Forward | GTGACCTCAAACCTTCCAACCT      | NM_175793.2          |
|                      | Reverse | GGCCAAGCCAAAGTCACAGA        |                      |
| <i>MTOR</i>          | Forward | CATGCTTCGTGTCTTCATGCA       | XM_002694043.6       |
|                      | Reverse | GGGCGTCAAATAACTTCACGAT      |                      |

**Supplementary Table S2.** Interaction effect of FBS and oxygen concentrations on the proliferation of SMCs by Two-way ANOVA.

|                | Day          | Sum of   | df | Mean Square | F     | p        | $\eta^2$ | $\eta^2p$ |
|----------------|--------------|----------|----|-------------|-------|----------|----------|-----------|
| <b>2 days</b>  | FBS          | 0.00173  | 2  | 0.00087     | 12    | 0.001    | 0.433    | 0.667     |
|                | Oxygen       | 0.00109  | 1  | 0.00109     | 15.08 | 0.002    | 0.272    | 0.557     |
|                | FBS * Oxygen | 3.11E-04 | 2  | 0.00016     | 2.15  | 0.159    | 0.078    | 0.264     |
|                | Residuals    | 8.67E-04 | 12 | 0.00007     |       |          |          |           |
| <b>4 days</b>  | FBS          | 0.0313   | 2  | 0.01565     | 30.62 | < .001   | 0.301    | 0.836     |
|                | Oxygen       | 0.05894  | 1  | 0.05894     | 115.3 | < .001   | 0.568    | 0.906     |
|                | FBS * Oxygen | 0.00748  | 2  | 0.00374     | 7.32  | * 0.008  | 0.072    | 0.549     |
|                | Residuals    | 0.00613  | 12 | 0.00051     |       |          |          |           |
| <b>6 days</b>  | FBS          | 0.4511   | 2  | 0.22557     | 58.6  | < .001   | 0.336    | 0.907     |
|                | Oxygen       | 0.5512   | 1  | 0.55125     | 143.2 | < .001   | 0.41     | 0.923     |
|                | FBS * Oxygen | 0.2956   | 2  | 0.14782     | 38.4  | * < .001 | 0.22     | 0.865     |
|                | Residuals    | 0.0462   | 12 | 0.00385     |       |          |          |           |
| <b>8 days</b>  | FBS          | 4.123    | 2  | 2.06150     | 98.1  | < .001   | 0.432    | 0.942     |
|                | Oxygen       | 4.59     | 1  | 4.59050     | 218.5 | < .001   | 0.481    | 0.948     |
|                | FBS * Oxygen | 0.576    | 2  | 0.28780     | 13.7  | * < .001 | 0.06     | 0.695     |
|                | Residuals    | 0.252    | 12 | 0.02100     |       |          |          |           |
| <b>10 days</b> | FBS          | 14.68    | 2  | 7.33900     | 51.5  | < .001   | 0.48     | 0.896     |
|                | Oxygen       | 7.97     | 1  | 7.97300     | 55.9  | < .001   | 0.261    | 0.823     |
|                | FBS * Oxygen | 6.19     | 2  | 3.09600     | 21.7  | * < .001 | 0.203    | 0.783     |
|                | Residuals    | 1.71     | 12 | 0.14300     |       |          |          |           |

\* $p < 0.05$

**Supplementary Table S3.** Interaction effect of FBS and oxygen concentration of myogenetic-transcription factor genes in cells cultured in vitro with GM for 7 days by two-way ANOVA.

|              | Genes        | Sum of Squares | df | Mean Square | F      | p     | $\eta^2$ | $\eta^2p$ |
|--------------|--------------|----------------|----|-------------|--------|-------|----------|-----------|
| <b>PAX7</b>  | FBS          | 0.377          | 2  | 0.18849     | 98.44  | <.001 | 0.212    | 0.916     |
|              | Oxygen       | 0.0262         | 2  | 0.01308     | 6.83   | 0.006 | 0.015    | 0.432     |
|              | FBS * Oxygen | 1.3395         | 4  | 0.33488     | 174.89 | <.001 | 0.754    | 0.975     |
|              | Residuals    | 0.0345         | 18 | 0.00191     |        |       |          |           |
| <b>MYF5</b>  | FBS          | 23.1057        | 2  | 11.55287    | 7998.1 | <.001 | 0.935    | 0.999     |
|              | Oxygen       | 0.1401         | 2  | 0.07003     | 48.5   | <.001 | 0.006    | 0.843     |
|              | FBS * Oxygen | 1.4502         | 4  | 0.36255     | 251    | <.001 | 0.059    | 0.982     |
|              | Residuals    | 0.026          | 18 | 0.00144     |        |       |          |           |
| <b>MYOD1</b> | FBS          | 153.9932       | 2  | 76.99658    | 69529  | <.001 | 0.986    | 1         |
|              | Oxygen       | 0.3456         | 2  | 0.1728      | 156    | <.001 | 0.002    | 0.945     |
|              | FBS * Oxygen | 1.7599         | 4  | 0.43998     | 397    | <.001 | 0.011    | 0.989     |
|              | Residuals    | 0.0199         | 18 | 0.00111     |        |       |          |           |
| <b>MYOG</b>  | FBS          | 494.5958       | 2  | 247.29789   | 19466  | <.001 | 0.994    | 1         |
|              | Oxygen       | 0.6007         | 2  | 0.30036     | 236    | <.001 | 0.001    | 0.963     |
|              | FBS * Oxygen | 2.1354         | 4  | 0.53386     | 420    | <.001 | 0.004    | 0.989     |
|              | Residuals    | 0.0229         | 18 | 0.00127     |        |       |          |           |
| <b>MYF6</b>  | FBS          | 1.5462         | 2  | 0.7731      | 193.09 | <.001 | 0.405    | 0.955     |
|              | Oxygen       | 0.00447        | 2  | 0.00223     | 0.558  | 0.582 | 0.001    | 0.058     |
|              | FBS * Oxygen | 2.19213        | 4  | 0.54803     | 136.88 | <.001 | 0.575    | 0.968     |
|              | Residuals    | 0.07207        | 18 | 0.004       |        |       |          |           |
| <b>MYH1</b>  | FBS          | 141.922        | 2  | 70.9612     | 1676.9 | <.001 | 0.953    | 0.995     |
|              | Oxygen       | 5.111          | 2  | 2.5556      | 60.4   | <.001 | 0.034    | 0.87      |
|              | FBS * Oxygen | 1.053          | 4  | 0.2633      | 6.22   | 0.003 | 0.007    | 0.58      |
|              | Residuals    | 0.762          | 18 | 0.0423      |        |       |          |           |

\* $p < 0.05$

**Supplementary Table S4.** Interaction effect of FBS and oxygen concentration of myogenetic-transcription factor genes in cells cultured in vitro with GM for 14 days by two-way

|              | <b>Genes</b> | <b>Sum of Squares</b> | <b>df</b> | <b>Mean Square</b> | <b>F</b> | <b>p</b> | <b><math>\eta^2</math></b> | <b><math>\eta^2p</math></b> |
|--------------|--------------|-----------------------|-----------|--------------------|----------|----------|----------------------------|-----------------------------|
| <b>PAX7</b>  | FBS          | 1.9174                | 2         | 0.95868            | 398.2    | <.001    | 0.271                      | 0.978                       |
|              | Oxygen       | 0.0486                | 2         | 0.02431            | 10.1     | 0.001    | 0.007                      | 0.529                       |
|              | FBS * Oxygen | 5.0674                | 4         | 1.26684            | 526.2    | <.001    | 0.716                      | 0.992                       |
|              | Residuals    | 0.0433                | 18        | 0.00241            |          |          |                            |                             |
| <b>MYF5</b>  | FBS          | 11.4128               | 2         | 5.70641            | 2399.89  | <.001    | 0.703                      | 0.996                       |
|              | Oxygen       | 0.0443                | 2         | 0.02214            | 9.31     | 0.002    | 0.003                      | 0.508                       |
|              | FBS * Oxygen | 4.7439                | 4         | 1.18597            | 498.77   | <.001    | 0.292                      | 0.991                       |
|              | Residuals    | 0.0428                | 18        | 0.00238            |          |          |                            |                             |
| <b>MYOD1</b> | FBS          | 2.7015                | 2         | 1.35077            | 793      | <.001    | 0.344                      | 0.989                       |
|              | Oxygen       | 0.4608                | 2         | 0.2304             | 135      | <.001    | 0.059                      | 0.938                       |
|              | FBS * Oxygen | 4.6588                | 4         | 1.16469            | 684      | <.001    | 0.593                      | 0.993                       |
|              | Residuals    | 0.0307                | 18        | 0.0017             |          |          |                            |                             |
| <b>MYOG</b>  | FBS          | 14.6482               | 2         | 7.324              | 8635     | <.001    | 0.832                      | 0.999                       |
|              | Oxygen       | 1.1668                | 2         | 0.583              | 688      | <.001    | 0.066                      | 0.987                       |
|              | FBS * Oxygen | 1.771                 | 4         | 0.443              | 522      | <.001    | 0.101                      | 0.991                       |
|              | Residuals    | 0.0153                | 18        | 8.48E-04           |          |          |                            |                             |
| <b>MYF6</b>  | FBS          | 2.8022                | 2         | 1.40108            | 399.5    | <.001    | 0.373                      | 0.978                       |
|              | Oxygen       | 0.3702                | 2         | 0.18509            | 52.8     | <.001    | 0.049                      | 0.854                       |
|              | FBS * Oxygen | 4.2728                | 4         | 1.0682             | 304.6    | <.001    | 0.569                      | 0.985                       |
|              | Residuals    | 0.0631                | 18        | 0.00351            |          |          |                            |                             |
| <b>MYH1</b>  | FBS          | 217.382               | 2         | 108.6908           | 8952.6   | <.001    | 0.971                      | 0.999                       |
|              | Oxygen       | 3.555                 | 2         | 1.7773             | 146.4    | <.001    | 0.016                      | 0.942                       |
|              | FBS * Oxygen | 2.638                 | 4         | 0.6595             | 54.3     | <.001    | 0.012                      | 0.923                       |
|              | Residuals    | 0.219                 | 18        | 0.0121             |          |          |                            |                             |

\*  $p < 0.05$

**Supplementary Table S5.** Interaction effect of FBS and oxygen concentration on proliferation and apoptosis genes in cells cultured in vitro with GM for 14 days.

|                           | <b>Genes</b> | <b>Sum of</b> | <b>df</b> | <b>Mean</b> | <b>F</b> | <b>p</b> | <b><math>\eta^2</math></b> | <b><math>\eta^2p</math></b> |
|---------------------------|--------------|---------------|-----------|-------------|----------|----------|----------------------------|-----------------------------|
| <b><i>TERT</i></b>        | FBS          | 8.2368        | 2         | 4.118       | 6178     | <.001    | 0.817                      | 0.999                       |
|                           | Oxygen       | 0.6462        | 2         | 0.323       | 485      | <.001    | 0.064                      | 0.982                       |
|                           | FBS *        | 1.1879        | 4         | 0.297       | 445      | <.001    | 0.118                      | 0.99                        |
|                           | Residuals    | 0.012         | 18        | 6.67E-04    |          |          |                            |                             |
| <b><i>CDKN1A(P21)</i></b> | FBS          | 20.39867      | 2         | 10.199      | 21684    | <.001    | 0.786                      | 1                           |
|                           | Oxygen       | 1.99103       | 2         | 0.996       | 2116     | <.001    | 0.077                      | 0.996                       |
|                           | FBS *        | 3.56404       | 4         | 0.891       | 1894     | <.001    | 0.137                      | 0.998                       |
|                           | Residuals    | 0.00847       | 18        | 4.70E-04    |          |          |                            |                             |
| <b><i>TP53</i></b>        | FBS          | 5.84436       | 2         | 2.922       | 8576     | <.001    | 0.773                      | 0.999                       |
|                           | Oxygen       | 0.32202       | 2         | 0.161       | 473      | <.001    | 0.043                      | 0.981                       |
|                           | FBS *        | 1.39136       | 4         | 0.348       | 1021     | <.001    | 0.184                      | 0.996                       |
|                           | Residuals    | 0.00613       | 18        | 3.41E-04    |          |          |                            |                             |
| <b><i>MYC</i></b>         | FBS          | 5.5214        | 2         | 2.761       | 12219    | <.001    | 0.483                      | 0.999                       |
|                           | Oxygen       | 4.52136       | 2         | 2.261       | 10006    | <.001    | 0.395                      | 0.999                       |
|                           | FBS *        | 1.39484       | 4         | 0.349       | 1543     | <.001    | 0.122                      | 0.997                       |
|                           | Residuals    | 0.00407       | 18        | 2.26E-04    |          |          |                            |                             |
| <b><i>BAX</i></b>         | FBS          | 3.17472       | 2         | 1.587       | 7026     | <.001    | 0.643                      | 0.999                       |
|                           | Oxygen       | 0.62512       | 2         | 0.313       | 1383     | <.001    | 0.127                      | 0.994                       |
|                           | FBS *        | 1.13195       | 4         | 0.283       | 1253     | <.001    | 0.229                      | 0.996                       |
|                           | Residuals    | 0.00407       | 18        | 2.26E-04    |          |          |                            |                             |
| <b><i>BCL2</i></b>        | FBS          | 0.03721       | 2         | 0.0186      | 56.4     | <.001    | 0.006                      | 0.862                       |
|                           | Oxygen       | 2.00501       | 2         | 1.0025      | 3041.3   | <.001    | 0.331                      | 0.997                       |
|                           | FBS *        | 4.01699       | 4         | 1.0042      | 3046.6   | <.001    | 0.662                      | 0.999                       |
|                           | Residuals    | 0.00593       | 18        | 3.30E-04    |          |          |                            |                             |

\* $p < 0.05$

**Supplementary Table S6.** Interaction effect of FBS and oxygen concentration on reactive oxygen species (ROS) genes in cells cultured in vitro with GM for 14 days.

| <b>Genes</b>           | <b>Sum of Squares</b> | <b>df</b> | <b>Mean Square</b> | <b>F</b> | <b>p</b> | <b><math>\eta^2</math></b> | <b><math>\eta^2p</math></b> |
|------------------------|-----------------------|-----------|--------------------|----------|----------|----------------------------|-----------------------------|
| <b><i>NOX4</i></b> FBS | 2.4779                | 2         | 1.239              | 7965     | < .001   | 0.411                      | 0.999                       |
| Oxygen                 | 0.52676               | 2         | 0.263              | 1693     | < .001   | 0.087                      | 0.995                       |
| FBS * Oxygen           | 3.01773               | 4         | 0.754              | 4850     | < .001   | 0.501                      | 0.999                       |
| Residuals              | 0.0028                | 18        | 1.56E-04           |          |          |                            |                             |
| <b><i>GPX1</i></b> FBS | 6.8595                | 2         | 3.42975            | 14936    | < .001   | 0.999                      | 0.999                       |
| Oxygen                 | 8.30E-04              | 2         | 4.15E-04           | 1.81     | 0.193    | 0                          | 0.167                       |
| FBS * Oxygen           | 0.00468               | 4         | 0.00117            | 5.1      | 0.006    | 0.001                      | 0.531                       |
| Residuals              | 0.00413               | 18        | 2.30E-04           |          |          |                            |                             |
| <b><i>SOD1</i></b> FBS | 2.84749               | 2         | 1.424              | 5339     | < .001   | 0.427                      | 0.998                       |
| Oxygen                 | 1.9608                | 2         | 0.98               | 3676     | < .001   | 0.294                      | 0.998                       |
| FBS * Oxygen           | 1.86311               | 4         | 0.466              | 1747     | < .001   | 0.279                      | 0.997                       |
| Residuals              | 0.0048                | 18        | 2.67E-04           |          |          |                            |                             |
| <b><i>SOD2</i></b> FBS | 11.53479              | 2         | 5.767              | 20763    | < .001   | 0.742                      | 1                           |
| Oxygen                 | 0.86214               | 2         | 0.431              | 1552     | < .001   | 0.055                      | 0.994                       |
| FBS * Oxygen           | 3.15164               | 4         | 0.788              | 2836     | < .001   | 0.203                      | 0.998                       |
| Residuals              | 0.005                 | 18        | 2.78E-04           |          |          |                            |                             |
| <b><i>SOD3</i></b> FBS | 45.3579               | 2         | 22.68              | 92778    | < .001   | 0.876                      | 1                           |
| Oxygen                 | 2.35512               | 2         | 1.18               | 4817     | < .001   | 0.045                      | 0.998                       |
| FBS * Oxygen           | 4.04441               | 4         | 1.01               | 4136     | < .001   | 0.078                      | 0.999                       |
| Residuals              | 0.0044                | 18        | 2.44E-04           |          |          |                            |                             |

\*  $p < 0.05$

**Supplementary Table S7.** Interaction effect of FBS and oxygen concentration on the regulation of myogenic regulators by SMCs differentiation medium.

|                                    | <b>Genes</b> | <b>Sum of</b> | <b>df</b> | <b>Mean Square</b> | <b>F</b> | <b>p</b> | <b><math>\eta^2</math></b> | <b><math>\eta^2p</math></b> |
|------------------------------------|--------------|---------------|-----------|--------------------|----------|----------|----------------------------|-----------------------------|
| <b>F10 DM</b><br><i>MYF5</i>       | FBS          | 0.42503       | 2         | 0.213              | 390      | <.001    | 0.201                      | 0.977                       |
|                                    | Oxygen       | 1.09081       | 2         | 0.545              | 1002     | <.001    | 0.516                      | 0.991                       |
|                                    | FBS * Oxygen | 0.5865        | 4         | 0.147              | 269      | <.001    | 0.278                      | 0.984                       |
|                                    | Residuals    | 0.0098        | 18        | 5.44E-04           |          |          |                            |                             |
| <b>F10 DM</b><br><i>MYOD1</i>      | FBS          | 1.40643       | 2         | 0.7032             | 5933     | <.001    | 0.725                      | 0.998                       |
|                                    | Oxygen       | 0.09283       | 2         | 0.0464             | 392      | <.001    | 0.048                      | 0.978                       |
|                                    | FBS * Oxygen | 0.43906       | 4         | 0.1098             | 926      | <.001    | 0.226                      | 0.995                       |
|                                    | Residuals    | 0.00213       | 18        | 1.19E-04           |          |          |                            |                             |
| <b>F10 DM</b><br><i>MYOG</i>       | FBS          | 1.6091        | 2         | 0.8045             | 940.4    | <.001    | 0.552                      | 0.991                       |
|                                    | Oxygen       | 1.0007        | 2         | 0.5003             | 584.8    | <.001    | 0.343                      | 0.985                       |
|                                    | FBS * Oxygen | 0.2902        | 4         | 0.0726             | 84.8     | <.001    | 0.1                        | 0.95                        |
|                                    | Residuals    | 0.0154        | 18        | 8.56E-04           |          |          |                            |                             |
| <b>F10 DM</b><br><i>MYF6</i>       | FBS          | 3.2132        | 2         | 1.6066             | 2507     | <.001    | 0.694                      | 0.996                       |
|                                    | Oxygen       | 1.0805        | 2         | 0.5402             | 843      | <.001    | 0.233                      | 0.989                       |
|                                    | FBS * Oxygen | 0.3225        | 4         | 0.0806             | 126      | <.001    | 0.07                       | 0.965                       |
|                                    | Residuals    | 0.0115        | 18        | 6.41E-04           |          |          |                            |                             |
| <b>F10 DM</b><br><i>MYH1</i>       | FBS          | 1.6469        | 2         | 0.82345            | 453      | <.001    | 0.47                       | 0.981                       |
|                                    | Oxygen       | 0.8412        | 2         | 0.4206             | 231      | <.001    | 0.24                       | 0.963                       |
|                                    | FBS * Oxygen | 0.9816        | 4         | 0.2454             | 135      | <.001    | 0.28                       | 0.968                       |
|                                    | Residuals    | 0.0327        | 18        | 0.00182            |          |          |                            |                             |
| <b>F10 DM</b><br><i>MSTN</i>       | FBS          | 2.1531        | 2         | 1.07656            | 830      | <.001    | 0.66                       | 0.989                       |
|                                    | Oxygen       | 0.4874        | 2         | 0.24369            | 188      | <.001    | 0.149                      | 0.954                       |
|                                    | FBS * Oxygen | 0.5987        | 4         | 0.14968            | 115      | <.001    | 0.184                      | 0.962                       |
|                                    | Residuals    | 0.0233        | 18        | 0.0013             |          |          |                            |                             |
| <b>DMEM/F12 DM</b><br><i>MYF5</i>  | FBS          | 0.1624        | 2         | 0.0812             | 76.9     | <.001    | 0.004                      | 0.895                       |
|                                    | Oxygen       | 34.8731       | 2         | 17.43656           | 16518.8  | <.001    | 0.932                      | 0.999                       |
|                                    | FBS * Oxygen | 2.3438        | 4         | 0.58594            | 555.1    | <.001    | 0.063                      | 0.992                       |
|                                    | Residuals    | 0.019         | 18        | 0.00106            |          |          |                            |                             |
| <b>DMEM/F12 DM</b><br><i>MYOD1</i> | FBS          | 3.4503        | 2         | 1.725              | 2948     | <.001    | 0.649                      | 0.997                       |
|                                    | Oxygen       | 1.0611        | 2         | 0.531              | 907      | <.001    | 0.2                        | 0.99                        |
|                                    | FBS * Oxygen | 0.7956        | 4         | 0.199              | 340      | <.001    | 0.15                       | 0.987                       |
|                                    | Residuals    | 0.0105        | 18        | 5.85E-04           |          |          |                            |                             |
| <b>DMEM/F12 DM</b><br><i>MYOG</i>  | FBS          | 2.8835        | 2         | 1.442              | 1582     | <.001    | 0.355                      | 0.994                       |
|                                    | Oxygen       | 4.58          | 2         | 2.29               | 2513     | <.001    | 0.565                      | 0.996                       |
|                                    | FBS * Oxygen | 0.6313        | 4         | 0.158              | 173      | <.001    | 0.078                      | 0.975                       |
|                                    | Residuals    | 0.0164        | 18        | 9.11E-04           |          |          |                            |                             |
| <b>DMEM/F12 DM</b><br><i>MYF6</i>  | FBS          | 1.4           | 2         | 0.7                | 566      | <.001    | 0.162                      | 0.984                       |
|                                    | Oxygen       | 1.8853        | 2         | 0.94267            | 762      | <.001    | 0.218                      | 0.988                       |
|                                    | FBS * Oxygen | 5.3219        | 4         | 1.33047            | 1076     | <.001    | 0.617                      | 0.996                       |
|                                    | Residuals    | 0.0223        | 18        | 0.00124            |          |          |                            |                             |
| <b>DMEM/F12 DM</b><br><i>MYH1</i>  | FBS          | 1.4356        | 2         | 0.718              | 941      | <.001    | 0.042                      | 0.991                       |
|                                    | Oxygen       | 31.7912       | 2         | 15.896             | 20834    | <.001    | 0.938                      | 1                           |
|                                    | FBS * Oxygen | 0.667         | 4         | 0.167              | 219      | <.001    | 0.02                       | 0.98                        |
|                                    | Residuals    | 0.0137        | 18        | 7.63E-04           |          |          |                            |                             |
| <b>DMEM/F12 DM</b><br><i>MSTN</i>  | FBS          | 4.992         | 2         | 2.496              | 950.52   | <.001    | 0.575                      | 0.991                       |
|                                    | Oxygen       | 3.595         | 2         | 1.79751            | 684.53   | <.001    | 0.414                      | 0.987                       |
|                                    | FBS * Oxygen | 0.0524        | 4         | 0.01311            | 4.99     | 0.007    | 0.006                      | 0.526                       |
|                                    | Residuals    | 0.0473        | 18        | 0.00263            |          |          |                            |                             |
